# Supplementary material for: Therapeutic advances in hormone-dependent cancers: focus on prostate, breast and ovarian cancers
Source: PubMed Central journal article supplement — Endocr Connect. 2019 Jan 14;8(2):R10–26. doi: 10.1530/EC-18-0425 (PMC6365668; doi:10.1530/ec-18-0425), 2019-01-14
Supplement: supplementary_table_1.pdf [file supplementary_table_1.pdf]

**Supplementary Table 1. Common adjuvant chemotherapy regimens for epithelial ovarian cancer.**

**Early Stage Epithelial Ovarian Cancer**

Paclitaxel/Carboplatin every 21 days for 3-6 cycles<sup>1,2</sup>

**Neoadjuvant Chemotherapy for Advanced Epithelial Ovarian Cancer**

- A. Paclitaxel/Carboplatin every 21 days for 3 cycles<sup>3,4</sup>
- B. Interval Debulking Surgery +/- HIPEC with cisplatin<sup>3,5</sup>
- C. Paclitaxel/Carboplatin every 21 days for 3 cycles<sup>3,4</sup>

**Adjuvant Chemotherapy following Optimal Primary Debulking Surgery (R≤1cm)**

- A. IV/IP Paclitaxel/Cisplatin for 6 cycles<sup>6</sup>
- B. IV Paclitaxel/Carboplatin for 6 cycles<sup>7</sup>
- C. IV Docetaxol/Carboplatin for 6 cycles<sup>8</sup>
- D. IV Paclitaxel/Carboplatin/Bevacizumab for 6 cycles followed by maintenance Bevacizumab for 12-17 additional cycles<sup>9,10</sup>

**Adjuvant Chemotherapy following Suboptimal Primary Debulking Surgery (R>1cm)**

- A. IV Paclitaxel/Carboplatin for 6 cycles<sup>6</sup>
- B. IV Paclitaxel/Carboplatin/Bevacizumab for 6 cycles followed by maintenance Bevacizumab<sup>9</sup>
- C. IV Weekly Paclitaxel/IV Carboplatin for 6 cycles<sup>11</sup>
