# Supplementary material for: Therapeutic advances in hormone-dependent cancers: focus on prostate, breast and ovarian cancers
Source: PubMed Central journal article supplement — Endocr Connect. 2019 Jan 14;8(2):R10–26. doi: 10.1530/EC-18-0425 (PMC6365668; doi:10.1530/ec-18-0425), 2019-01-14
Supplement: supplementary_table_2.pdf [file supplementary_table_2.pdf]

**Supplementary Table 2. Common therapies for platinum-sensitive epithelial ovarian cancer**

**Traditional Chemotherapy**

- A. Paclitaxel/carboplatin every three weeks for 6-8 cycles<sup>12</sup>
- B. Gemcitabine/carboplatin every three weeks for 6 cycles<sup>13</sup>
- C. Liposomal doxorubicin/carboplatin every four weeks for 6 cycles<sup>14</sup>

**Tradition Chemotherapy +  
Bevacizumab**

- A. Gemcitabine/carboplatin/bevacizumab every three weeks for 6 cycles<sup>a 15</sup>
- B. Paclitaxel/Carboplatin/Bevacizumab every three weeks for 6 cycles<sup>a 16</sup>

**PARPi treatment**

- A. Rucaparib<sup>b,c 17</sup>

**Maintenance PARPi following response to platinum therapy**

- A. Olaparib<sup>b, d 18</sup>
- B. Niraparib<sup>b 19</sup>
- C. Rucaparib<sup>b 16</sup>

<sup>a</sup>Bevacizumab continued until disease progression or unacceptable toxicity

<sup>b</sup>PARPi continued until disease progression or unacceptable toxicity

<sup>c</sup>germline BRCA1 or BRCA2 mutations patients or somatic loss of heterozygosity (high)

<sup>d</sup>germline BRCA1 or BRCA2 deficient patients only
