# Supplementary material for: Therapeutic advances in hormone-dependent cancers: focus on prostate, breast and ovarian cancers
Source: PubMed Central journal article supplement — Endocr Connect. 2019 Jan 14;8(2):R10–26. doi: 10.1530/EC-18-0425 (PMC6365668; doi:10.1530/ec-18-0425), 2019-01-14
Supplement: supplementary_table_3.pdf [file supplementary_table_3.pdf]

**Supplementary Table 3. Common therapies for platinum-resistant epithelial ovarian cancer.**

**Single-Agent Chemotherapy<sup>a</sup>**

- A. Liposomal Doxorubicin<sup>20</sup>
- B. Topotecan<sup>21</sup>
- C. Paclitaxel<sup>22</sup>
- D. Gemzar<sup>23</sup>
- E. Bevacizumab<sup>24</sup>
- F. Nabpaclitaxel<sup>25</sup>
- G. Oral Etoposide<sup>26</sup>
- H. Pemetrexed<sup>27</sup>
- I. Docetaxel<sup>28</sup>

**Combination chemotherapy with anti-angiogenesis<sup>a</sup>**

- A. Liposomal doxorubicin/bevacizumab every 28 days<sup>29</sup>
- B. Paclitaxel/bevacizumab every 28 days<sup>29</sup>
- C. Topotecan/bevacizumab every 28 days<sup>29</sup>
- D. Nabpaclitaxel/bevacizumab<sup>30</sup>

**Endocrine therapy<sup>a</sup>**

- A. Tamoxifen<sup>31</sup>
- B. Letrozole<sup>b 32</sup>
- C. Fulvestrant every 28 days<sup>b 33</sup>

**PARPi**

- A. Olaparib<sup>c 34</sup>
- B. Rucaparib<sup>d 35</sup>

<sup>a</sup>continued until disease progression or unacceptable toxicity

<sup>b</sup>estrogen-receptor positive patients only

<sup>c</sup>germline BRCA1 or BRCA2 deficient patients only

<sup>d</sup>germline BRCA1 or BRCA2 mutations patients or somatic loss of heterozygosity (high)
