# Supplementary material for: Therapeutic advances in hormone-dependent cancers: focus on prostate, breast and ovarian cancers
Source: PubMed Central journal article supplement — Endocr Connect. 2019 Jan 14;8(2):R10–26. doi: 10.1530/EC-18-0425 (PMC6365668; doi:10.1530/ec-18-0425), 2019-01-14
Supplement: supplementary_table_4.pdf [file supplementary_table_4.pdf]

| <b><u>PI3K/AKT/mTOR Pathway Inhibition</u></b> |                                                                                                                         | <b><u>Phase</u></b> | <b><u>Status</u></b> |
|------------------------------------------------|-------------------------------------------------------------------------------------------------------------------------|---------------------|----------------------|
| NCT01226316                                    | Safety, Tolerability and Potential Anti-cancer Activity of Increasing Doses of AZD5363 in Different Treatment Schedules | I                   | Recruiting           |
| NCT02142803                                    | TORC1/2 Inhibitor MLN0128 and Bevacizumab in Treating Patients With Recurrent Glioblastoma or Advanced Solid Tumors     | I                   | Recruiting           |
| NCT02646319                                    | Nanoparticle Albumin-Bound Rapamycin in Treating Patients With Advanced Cancer With mTOR Mutations                      | II                  | Recruiting           |

### **MAPK Pathway Inhibition**

|             |                                                                                                         |        |            |
|-------------|---------------------------------------------------------------------------------------------------------|--------|------------|
| NCT02101788 | Trametinib in Treating Patients With Recurrent or Progressive Low-Grade EOC or Peritoneal Cavity Cancer | II/III | Recruiting |
|-------------|---------------------------------------------------------------------------------------------------------|--------|------------|

### **Anti-Angiogenic Therapies**

|             |                                                                                                                                   |      |            |
|-------------|-----------------------------------------------------------------------------------------------------------------------------------|------|------------|
| NCT02558348 | Phase I/IIa Evaluation of AL3818 in Subjects With Recurrent or Metastatic Endometrial, Ovarian or Cervical Cancer (AL3818-US-001) | I/II | Recruiting |
| NCT01669798 | BIBF 1120 in Bevacizumab Resistant, Persistent or Recurrent Epithelial EOC                                                        | II   | Recruiting |

### **PARP Inhibition**

|             |                                                                                                                                       |     |            |
|-------------|---------------------------------------------------------------------------------------------------------------------------------------|-----|------------|
| NCT02354586 | A Study of Niraparib in Patients With EOC Who Have Received Three or Four Previous Chemotherapy Regimens (QUADRA)                     | II  | Recruiting |
| NCT02575651 | A Phase I Study of Fluzoparib in Patients with Advanced Solid Malignancies                                                            | I   | Recruiting |
| NCT02655016 | A Study of Niraparib Maintenance Treatment in Patients with Advanced EOC Following Response on Front-Line Platinum-Based Chemotherapy | III | Recruiting |

### **Combination PARPi/Anti-Angiogenesis**

|             |                                                                                                                                                                                                                                         |     |            |
|-------------|-----------------------------------------------------------------------------------------------------------------------------------------------------------------------------------------------------------------------------------------|-----|------------|
| NCT02446600 | A Phase III Study Comparing Single-Agent Olaparib or the Combination of Cediranib and Olaparib to Standard Platinum-Based Chemotherapy in Women With Recurrent Platinum-Sensitive Ovarian, Fallopian Tube, or Primary Peritoneal Cancer | III | Recruiting |
| NCT03117933 | Olaparib +/- Cediranib or Chemotherapy in Patients With BRCA Mutated Platinum-resistant Ovarian Cancer (OCTOVA)                                                                                                                         | II  | Recruiting |

### **Immunotherapy + Chemotherapy**

|             |                                                                                                                                                                                                                                                          |      |                        |
|-------------|----------------------------------------------------------------------------------------------------------------------------------------------------------------------------------------------------------------------------------------------------------|------|------------------------|
| NCT02520154 | Matched Paired Pharmacodynamics and Feasibility Study of Pembrolizumab in Combination With Chemotherapy in Frontline Ovarian Cancer                                                                                                                      | II   | Recruiting             |
| NCT02726997 | Matched Paired Pharmacodynamics and Feasibility Study of Durvalumab in Combination With Chemotherapy in Frontline Ovarian Cancer (N-Dur)                                                                                                                 | I/II | Recruiting             |
| NCT02718417 | A Randomized, Open-label, Multicenter, Phase 3 Study To Evaluate The Efficacy And Safety Of Avelumab (msb0010718c) In Combination With And/or Following Chemotherapy In Patients With Previously Untreated Epithelial Ovarian Cancer Javelin Ovarian 100 | III  | Recruiting             |
| NCT02580058 | A Phase 3, Multicenter, Randomized, Open-label Study Of Avelumab (msb0010718c) Alone Or In Combination With Pegylated Liposomal Doxorubicin Versus Pegylated Liposomal Doxorubicin Alone In Patients With Platinum-resistant/Refractory Ovarian Cancer   | III  | Active, Not Recruiting |

|                 |                                                                                                                                                                                                                                                                                                                                    |     |            |
|-----------------|------------------------------------------------------------------------------------------------------------------------------------------------------------------------------------------------------------------------------------------------------------------------------------------------------------------------------------|-----|------------|
| NCT02923<br>739 | A Randomized Phase II Induction Discontinuation Trial of Emactuzumab Following Paclitaxel and Bevacizumab in Patients With Platinum-Resistant, Epithelial Ovarian, Fallopian Tube or Primary Peritoneal Cancer - REDIRECT                                                                                                          | II  | Recruiting |
| NCT02839<br>707 | A Randomized, Phase II/III Study of Pegylated Liposomal Doxorubicin and CTEP-Supplied Atezolizumab Versus Pegylated Liposomal Doxorubicin/Bevacizumab and CTEP-Supplied Atezolizumab Versus Pegylated Liposomal Doxorubicin/Bevacizumab in Platinum Resistant Ovarian Cancer                                                       | III | Recruiting |
| NCT03245<br>892 | Single center, non-randomized, open label, pilot study to evaluate the safety and tolerability of neoadjuvant and post-surgical dose dense paclitaxel and carboplatin chemotherapy in combination with nivolumab for the treatment of advanced high grade serous cancers of ovarian, fallopian tube, or primary peritoneal origin. | I   | Recruiting |
| NCT03038<br>100 | A Phase III, Multicenter, Randomized, Study of Atezolizumab Versus Placebo Administered in Combination With Paclitaxel, Carboplatin, and Bevacizumab to Patients With Newly-Diagnosed Stage III or Stage IV Ovarian, Fallopian Tube, or Primary Peritoneal Cancer                                                                  | III | Recruiting |

#### **Cell Cycle Checkpoint Inhibition**

|                 |                                                                                               |   |            |
|-----------------|-----------------------------------------------------------------------------------------------|---|------------|
| NCT02659<br>241 | A Pilot Study of Wee1 Inhibition Induction Prior to Tumor Reductive Surgery in Ovarian Cancer | I | Recruiting |
|-----------------|-----------------------------------------------------------------------------------------------|---|------------|

#### **Immunotherapy Combination**

|                 |                                                                                                                                                                               |    |                        |
|-----------------|-------------------------------------------------------------------------------------------------------------------------------------------------------------------------------|----|------------------------|
| NCT03026<br>062 | Randomized Phase II Trial of Durvalumab (MEDI4736) and Tremelimumab Administered in Combination Versus Sequentially in Recurrent Platinum-Resistant Epithelial Ovarian Cancer | II | Recruiting             |
| NCT02498<br>600 | Phase II Randomized Trial of Nivolumab With or Without Ipilimumab in Patients With Persistent or Recurrent Epithelial Ovarian, Primary Peritoneal, or Fallopian Tube Cancer   | II | Active, Not Recruiting |

#### **Folate Receptor Antagonist Therapy**

|                 |                                                                                                                                                                                                                                                                                                               |     |            |
|-----------------|---------------------------------------------------------------------------------------------------------------------------------------------------------------------------------------------------------------------------------------------------------------------------------------------------------------|-----|------------|
| NCT02631<br>876 | FORWARD I: A Randomized, Open Label Phase 3 Study to Evaluate the Safety and Efficacy of Mirvetuximab Soravtansine (IMGN853) Versus Investigator's Choice of Chemotherapy in Women With Folate Receptor Alpha Positive Advanced Epithelial Ovarian Cancer, Primary Peritoneal Cancer or Fallopian Tube Cancer | III | Recruiting |
| NCT02606<br>305 | Study of Mirvetuximab Soravtansine in Comb. With Bevacizumab, Carboplatin, PLD, Pembrolizumab, or Bevacizumab + Carboplatin in Adults With FRa + Adv. EOC, Primary Peritoneal or Fallopian Tube Cancer                                                                                                        | I   | Recruiting |

**Supplementary Table 4. Ongoing ovarian cancer clinical trials.**
